# Supplementary material
Source: PubMed Central journal article supplement (PMC7267846)
Supplement: jama-323-2160-s003.pdf [file jama-323-2160-s003.pdf]

## Supplementary Online Content

von Dach E, Albrich WC, Brunel AS, et al. Effect of C-reactive protein–guided antibiotic treatment duration, 7-day treatment, or 14-day treatment on 30-day clinical failure rate in patients with uncomplicated gram-negative bacteremia. *JAMA*. doi:10.1001/jama.2020.6348

### **Supplement 3.** eAppendix

eResults

eReferences

This supplementary material has been provided by the authors to give readers additional information about their work.

ONLINE SUPPLEMENT #3 TO THE ARTICLE:

**Effect of C-reactive-protein-guided antibiotic treatment duration, 7-day treatment, or 14-day treatment on 30-day clinical failure rate in patients with uncomplicated gram-negative bacteremia: a randomized clinical trial**

Elodie von Dach PhD\*<sup>1,2</sup>, Werner C. Albrich MD\*<sup>3</sup>, Anne-Sophie Brunel MD<sup>4</sup>, Virginie Prendki MD<sup>5</sup>, Clémence Cuvelier MD<sup>5</sup>, Domenica Flury MD<sup>3</sup>, Angèle Gayet-Ageron MD<sup>2,6</sup>, PhD, Benedikt Huttner MD<sup>1</sup>, Philipp Kohler MD<sup>3</sup>, Eva Lemmenmeier MD<sup>3</sup>, Shawna McCallin PhD<sup>1</sup>, Anne Rossel MD<sup>7</sup>, Stephan Harbarth MD<sup>1</sup>, Laurent Kaiser MD<sup>1</sup>, Pierre-Yves Bochud MD<sup>4</sup>, Angela Huttner MD<sup>1§</sup>

1 Division of Infectious Diseases, Geneva University Hospitals and Faculty of Medicine, Geneva, Switzerland

2 Clinical Research Center, Geneva University Hospitals and Faculty of Medicine, Geneva, Switzerland

3 Division of Infectious Diseases and Hospital Epidemiology, Cantonal Hospital St. Gallen, St. Gallen, Switzerland

4 Infectious Diseases Service, University Hospital and University of Lausanne, Switzerland

5 Division of Internal Medicine of the Aged, Geneva University Hospitals and Faculty of Medicine, Geneva, Switzerland

6 Division of Clinical Epidemiology, Department of Health and Community Medicine, Geneva University Hospitals, Geneva, Switzerland

7 Department of Internal Medicine, Geneva University Hospitals, Geneva, Switzerland

\*Equal contribution

**Table of Contents**

**eAppendix 1: Immunosuppression as an exclusion criterion..... 3**

**eAppendix 2: Double blinding between randomization and therapy discontinuation ..... 3**

**eAppendix 3: Rationale for the algorithm for C-reactive-protein-guided antibiotic discontinuation. 4**

**eAppendix 4: Total days of antibiotic therapy (DOT) ..... 4**

**eAppendix 5: Laboratory methods ..... 4**

Blood culturing ..... 4

Diagnosis of *Clostridioides difficile* infection ..... 4

**eAppendix 6: P values for non-inferiority ..... 5**

**Results ..... 6**

**Table S1. Baseline demographic and clinical characteristics in the per-protocol population. .... 6**

**Table S2. Clinical outcomes in the per-protocol population. .... 7**

**Table S3. Protocol deviations by study group and reasons for non-adherence to treatment duration assignment, primary analysis set..... 8**

**Table S4. Baseline characteristics and outcomes of patients receiving antibiotic therapy durations longer than the per-protocol assignment. .... 9**

**Table S5A. Patients and clinical failure in the CRP-guided group by days of antibiotic therapy received. .... 10**

**Table S5B. C-reactive protein kinetics by study group. .... 10**

**Table S6. All-cause mortality by treatment group at all study time points (primary analysis population). .... 11**

**Table S7. Sensitivity analyses for the primary outcome with best-worst-case and worst-best-case scenarios..... 11**

**Table S8. Mixed-effects modeling results. .... 11**

**Table S9. Bivariable logistic regression models for clinical failure at day 30. .... 12**

**Table S10A. Multivariable logistic regression model for clinical failure at day 30..... 13**

**Table S10B. *Post-hoc* multivariable logistic regression model for clinical failure at day 30. .... 13**

**Table S11. Adverse events considered possibly, probably or certainly related to study antibiotic(s). .... 14**

**Table S12. Serious adverse events considered possibly, probably or certainly related to study antibiotic(s)..... 14**

**References ..... 15**

## eAppendix 1: Immunosuppression as an exclusion criterion

Patients who were deemed severely immunosuppressed in the two weeks before screening were not eligible for inclusion. Fixed criteria for severe immunosuppression were the following:

- HIV infection with CD4 cell count  $\leq 500/\mu\text{l}$
- Hematopoietic stem-cell transplantation in the first month after transplantation and at any time before engraftment
- Neutropenia in the 48 hours prior to randomization
- Receipt of high-dose steroids [ $>40$  mg prednisone or its equivalent] daily for  $> 2$  weeks) in the two weeks prior to randomization

Other immunosuppressive factors, such as high-dose immunosuppressant therapy, were taken into account by including investigators on a case-by-case basis.

## eAppendix 2: Double blinding between randomization and therapy discontinuation

The purpose of this blind was, above all, to protect against any potential change in physician behavior and management. For example, a physician with a bias toward 14 days of therapy, once aware that his or her patient was randomized to only 7 days, might have ordered additional imaging on day 6 to rule out some kind of occult abscess—and thus reassure him or herself.

Each site's investigator team kept at least one person unblinded. This person was responsible for randomizing included patients and for contacting the investigator or patient and/or his or her doctor on the morning of the day the antibiotic therapy was to be discontinued. For patients in the CRP group, this meant following CRP and temperature trends closely. In order to keep the blind, all patients' physicians were encouraged and reminded to obtain regular CRP levels, whatever their patients' actual duration assignment.



**A Point-of-care, Informatics- based Randomized, controlled trial for decreasing overutilization of Antibiotic Therapy**

---

**CONTEXTE : LA PLAT-FORME POC ET L'ESSAI PROTOTYPIQUE**

La randomisation au point de care (POC) Comme les essais randomisés traditionnels sont chers et souvent pas représentatifs, la randomisation en POC utilise le dossier électronique pour faciliter la randomisation de patients. Ceci concerne des traitements non expérimentaux et pour lesquels il existe une équivalence clinique.

**La bactériémie à germe Gram négatif (BGN)**

Il n'existe aucune évidence clinique sur la durée optimale du traitement antibiotique pour la BGN. Actuellement la durée du traitement est variable selon le médecin en charge (habituellement entre 7 et 14 jours). Dans cette étude, seule la durée est évaluée et non le type d'antibiotique.

---

**OBJECTIFS**

- Déterminer la non-infériorité des durées plus courtes d'antibiothérapie pour la BGN
- Élargir les connaissances permettant de diminuer en toute sécurité la sur-utilisation des antibiotiques
- Déterminer si ces durées peuvent être déterminées en toute sécurité par un algorithme simple employant la CRP et autres données cliniques collectées dans la pratique quotidienne



**CRITERES D'INCLUSION/EXCLUSION**

**Inclusion:** âge  $\geq 18$  ans, BGN, traitement antibiotique microbiologiquement efficace

**Exclusion:** immunosuppression, abcès, etc.

**ISSUES**

**Issue primaire :** incidence d'échec clinique à J30

Issues secondaires : utilisation et effets secondaires des antibiotiques, incidence d'infection à *C. difficile*, etc.

Le patient sera identifié par DPI et via le laboratoire de bactériologie, par un membre de l'équipe ou les infectiologues.

---

**REMARQUES**

- Les explications seront données au patient par les investigateurs.
- Lors d'un consentement oral, il peut être demandé au médecin en charge d'attester de l'accord du patient par une signature.
- La sécurité prime! Le médecin en charge est libre de ne pas suivre les recommandations de l'étude si le sens clinique le lui dicte.

**QUESTIONS ?**

Appelez-nous !

Investigateur principal:  
Dre Angela Huttner 33396

Co-investigateurs:  
Dre Elodie Von Dach 30844  
Dre Anne Rossel 34532  
Dre Virginie Prendki (3C) 38308







Before the trial launched, information sessions were held for physicians and nurses of all participating hospitals. The strategy of discontinuation in the CRP group was described only qualitatively: staff were informed only that a "simple algorithm using the CRP and other routinely collected clinical data" would be applied (see study flyer, right). The specifics of the algorithm (75% reduction from peak CRP) were not disclosed so that physicians would not be able to determine for themselves when the discontinuation date would be.

### **eAppendix 3: Rationale for the algorithm for C-reactive-protein-guided antibiotic discontinuation**

The rationale for the individualized algorithm's specific use of a 75% reduction in peak C-reactive protein (CRP) values is based on a randomized clinical trial of patients in intensive-care units with severe sepsis or septic shock with or without bacteremia.<sup>1</sup> That study demonstrated that an even more restrictive algorithm (antibiotic discontinuation once the CRP decreased by  $\geq 50\%$  if peak CRP was  $\geq 100$  mg/l or once CRP was less than 25 mg/l if peak CRP was  $< 100$  mg/l) was safe and effective to reduce antibiotic use. This study additionally used a 7-day maximum duration of antibiotic therapy for non-bacteremic patients, while bacteremic patients received at least 7 day of antibiotics.<sup>1</sup> Our individualized algorithm is slightly adapted in analogy to procalcitonin-based algorithms, which have been successfully tested in several randomized clinical trials (RCT) and used  $\geq 80\%$  decreases of procalcitonin to discontinue antibiotic therapy.<sup>2-6</sup> Our slight modifications take into account the slower decrease of CRP values compared to procalcitonin after resolution of an infection<sup>5,7</sup> and incorporate an additional safety margin compared to the study by Oliveira et al., which treated bacteremic patients differentially.<sup>1</sup> Of note, if the CRP value did not decrease by 75% by day 14, the marker was no longer used to guide the duration of therapy. In these cases, the duration was determined by clinical judgment, per usual practice.

### **eAppendix 4: Total days of antibiotic therapy (DOT)**

The outcome of total days of antibiotic therapy (DOT) in the 90-day study period included all antibiotics taken from day 1 (the first day of microbiologically efficacious antibiotic therapy) to day 90. By definition, if a patient received two different antibiotics on one day, the patient was considered to have two DOT on this day.

### **eAppendix 5: Laboratory methods**

#### Blood culturing

Blood cultures and CRP values were processed by the three sites' laboratories, which follow the same procedures. Blood cultures are routinely drawn for temperatures  $\geq 38.0^{\circ}\text{C}$ . For each blood culture set, the combination of one BD BACTEC™ Plus Aerobic medium and one BD BACTEC™ Plus Anaerobic medium are inoculated by 8-10ml of whole blood. Inoculated bottles are immediately placed in the BD BACTEC™ FX. Individual blood culture bottles are removed from the automated blood culture system when growth is detected and direct examination with gram and acridine-orange staining is performed on an aspirate, with inoculation of solid culture media (Columbia agar, Columbia CNA agar, Chocolate agar, MacConkey agar, and CDC anaerobe agar). The remaining material is incubated in traditional incubators for 7 days before being inactivated. For CRP determination, whole blood is collected in heparin tubes and centrifuged; serum CRP is measured via immunoturbidimetry.

#### Diagnosis of *Clostridioides difficile* infection

At all sites, testing for *C. difficile* infection was done only in the presence of clinical symptoms supporting the diagnosis. Per routine in Geneva and Lausanne, a single stool sample is collected for detection of toxin by polymerase chain reaction (PCR); if this is positive, the laboratories perform an enzyme immunoassay (EIA) for toxins A and B on the same sample. If this second test is positive, the diagnosis is considered probable. In St. Gallen, samples are tested by combined EIA for both glutamate dehydrogenase and toxins A/B. If both assays are positive, a diagnosis of *C. difficile* is confirmed. If only one is positive, a nucleic acid amplification test (NAAT) is performed; a diagnosis of *C. difficile* is confirmed if the NAAT is positive. If both EIAs for GDH and toxin A/B are negative, a diagnosis of *C. difficile* is considered unlikely.

## **eAppendix 6: P values for non-inferiority**

Two-samples proportion tests are used. They rely on the z-statistic, which test the absence of difference

$$z = (P_{\text{int}} - P_{\text{ctrl}})/SE$$

where SE is the standard error. To include the non-inferiority margin into the calculation, the z-statistic needs to be modified to

$$z = (P_{\text{int}} - P_{\text{ctrl}} - \delta)/SE$$

where  $\delta$  is the non-inferiority margin.

The following R code is used for the computations of the non-inferiority p-values.

```
int.f <- 4 # failure in intervention
ctrl.f <- 9 # failure in control
int.s <- 160 # success in intervention
ctrl.s <- 154 # success in control
n.int <- int.f + int.s # number of observations (patients) in intervention
n.ctrl <- ctrl.f + ctrl.s # number of observations (patients) in control

p.int <- int.f / n.int # proportion of failure in intervention arm
p.ctrl <- ctrl.f / n.ctrl # proportion of failure in control arm

ni.margin <- 0.1 # non-inferiority margin
# diff in proportion (int - ctrl)
p.int - p.ctrl

# upper bound of one-sided 97.5% confidence interval
(p.int - p.ctrl) + qnorm(1-0.025)*sqrt( p.int*(1-p.int)/n.int + p.ctrl*(1-p.ctrl)/n.ctrl)

# z-statistic for non-inferiority
p.pool <- ( int.f + ctrl.f ) / ( n.int + n.ctrl ) # proportion of failure overall
se <- sqrt( ( p.pool * ( 1 - p.pool ) ) * ( 1/n.int + 1/n.ctrl ) ) # pooled se
z <- ( p.int - p.ctrl - ni.margin ) / se # subtract margin for non-inferiority p-value

# p-value for non-inferiority
pnorm(z)
```

## Results

**Table S1. Baseline demographic and clinical characteristics in the per-protocol population.**

|                                                                               | CRP-guided<br>N=130 | 7 days<br>N=141 | 14 days<br>N=143 |
|-------------------------------------------------------------------------------|---------------------|-----------------|------------------|
| Female sex (%)                                                                | 77 (59)             | 90 (64)         | 80 (56)          |
| Male sex (%)                                                                  | 53 (41)             | 51 (36)         | 63 (44)          |
| Median age (IQR)                                                              | 79 (71-86)          | 80 (70-87)      | 79 (64-85)       |
| Ethnicity (%)                                                                 |                     |                 |                  |
| - Caucasian                                                                   | 126 (97.6)          | 134 (95)        | 134 (94)         |
| - Asian                                                                       | 1 (1)               | 3 (2)           | 2 (1)            |
| - Hispanic                                                                    | 1 (1)               | 2 (1)           | 4 (3)            |
| - African                                                                     | 1 (1)               | 2 (1)           | 1 (1)            |
| Median body mass index (IQR)                                                  | 26 (23-31)          | 26 (23-30)      | 26 (24-29)       |
| Median estimated glomerular filtration rate, ml/min/1.73 m <sup>2</sup> (IQR) | 51 (38-72)          | 51 (32-70)      | 56 (38-74)       |
| Median Charlson comorbidity index* (IQR)                                      | 1 (0-2)             | 1 (0-2)         | 1 (0-2)          |
| Diabetes mellitus (%)                                                         | 30 (23)             | 31 (22)         | 33 (23)          |
| Presence of removable urethral catheter (%)                                   | 14 (11)             | 6 (4)           | 19 (13)          |
| Presence of foreign-body material (%)                                         | 32 (25)             | 30 (21)         | 26 (18)          |
| - Implanted urinary device** (%)                                              | 4 (3)               | 3 (2)           | 5 (4)            |
| - Artificial joint (%)                                                        | 4 (3)               | 5 (4)           | 9 (6)            |
| - Endovascular device (%)                                                     | 3 (2)               | 2 (1)           | 0 (0)            |
| - Artificial valve (%)                                                        | 3 (2)               | 2 (1)           | 0 (0)            |
| - Other (%)                                                                   | 18 (14)             | 19 (13)         | 13 (9)           |
| Source of bacteremia                                                          |                     |                 |                  |
| - Urinary (%)                                                                 | 98 (75)             | 91 (65)         | 102 (71)         |
| - Abdominal (%)                                                               | 22 (17)             | 29 (21)         | 17 (12)          |
| - Pulmonary (%)                                                               | 5 (4)               | 13 (9)          | 13 (9)           |
| - Endovascular device (%)                                                     | 1 (1)               | 4 (3)           | 5 (3)            |
| - Wound (%)                                                                   | 0 (0)               | 2 (1)           | 2 (1)            |
| - Unknown (%)                                                                 | 5 (4)               | 2 (1)           | 4 (3)            |
| Bacteremia acquisition                                                        |                     |                 |                  |
| - Community-acquired (%)                                                      | 85 (65)             | 90 (64)         | 84 (59)          |
| - Nosocomial (%)                                                              | 33 (25)             | 37 (26)         | 39 (27)          |
| - Healthcare-associated (%)                                                   | 12 (9)              | 14 (10)         | 20 (14)          |
| Median qSOFA score (IQR)                                                      | 1 (0-2)             | 1 (0-2)         | 1 (0-1)          |

\*Full range was 0-9 for the CRP-guided group, 0-7 for the 7-day group, and 0-8 for the 14-day group with higher values indicating greater number or degree of underlying comorbidities

\*\*Suprapubic catheter (n=6), J-tube ("pigtail") catheter (n=2), nephrostomy tube (n=3), ileal conduit (n=1).

+ Bacteremias were characterized as nosocomial if the first positive blood culture was drawn  $\geq$ 48 hours after admission; healthcare-associated if drawn in the first 48 hours of hospitalization in a patient transferred from another healthcare facility, receiving chronic dialysis, or diagnosed with metastatic cancer;<sup>18</sup> and community-acquired if none of these conditions were met.

<sup>§</sup>Full range was 0-3 in all groups with higher values indicating higher severity of acute illness. The qSOFA score was developed for early identification of patients at high risk for poor outcome with an infection. The patient receives one point for each of the following: low blood pressure (systolic blood pressure  $\leq$ 100 mmHg), high respiratory rate ( $\geq$ 22 breaths/minute), or altered mentation (Glasgow coma scale score  $\leq$ 14). A score of  $\geq$ 2 is associated with a higher risk of death or prolonged ICU stay.<sup>19</sup>

**Table S2. Clinical outcomes in the per-protocol population.**

The primary outcome was clinical response through day 30; clinical response through days 60 and 90 were secondary outcomes.

|                                         | CRP-guided<br>N=130 | 7 days<br>(fixed)<br>N=141 | 14 days<br>(fixed)<br>N=143 | % Difference                                   |                                               |
|-----------------------------------------|---------------------|----------------------------|-----------------------------|------------------------------------------------|-----------------------------------------------|
|                                         |                     |                            |                             | CRP-guided vs 14 days                          | 7 days vs 14 days                             |
|                                         |                     |                            |                             | 1-sided 97.5%CI; P°                            | 1-sided 97.5%CI, P°                           |
| <b>Clinical response through day 30</b> |                     |                            |                             |                                                |                                               |
| <b>Clinical success (%)</b>             | <b>127 (97.7)</b>   | <b>133 (94.3)</b>          | <b>137 (95.8)</b>           | <b>-1.9<br/>(-infinity, 2.3);<br/>&lt;.001</b> | <b>1.5<br/>(-infinity, 6.5);<br/>&lt;.001</b> |
| <b>Clinical failure (%)</b>             | <b>3 (2.3)</b>      | <b>8 (5.7)</b>             | <b>6 (4.2)</b>              |                                                |                                               |
| Recurrent bacteremia (%)                | 0 (0)               | 1 (13) <sup>§</sup>        | 2 (33)                      |                                                |                                               |
| Suppurative local complication (%)      | 0 (0)               | 2 (25) <sup>§</sup>        | 0 (0)                       |                                                |                                               |
| Distal complication (%)                 | 0 (0)               | 0 (0)                      | 0 (0)                       |                                                |                                               |
| Targeted therapy restart (%)            | 2 (66.7)            | 3 (38)                     | 2 (33)                      |                                                |                                               |
| All-cause mortality* (%)                | 1 (33.3)            | 3 (38)                     | 2 (33)                      |                                                |                                               |
| <b>Clinical response through day 60</b> |                     |                            |                             |                                                |                                               |
| <b>Clinical success (%)</b>             | <b>116 (94.3)</b>   | <b>119 (90.2)</b>          | <b>131 (93.6)</b>           | <b>-0.7<br/>(-infinity, 5.0);<br/>&lt;.001</b> | <b>3.4<br/>(-infinity, 9.9);<br/>.023</b>     |
| <b>Clinical failure (%)</b>             | <b>7 (5.7)</b>      | <b>13 (9.8)</b>            | <b>9 (6.4)</b>              |                                                |                                               |
| Recurrent bacteremia (%)                | 0 (0)               | 1 (77) <sup>§</sup>        | 2 (22)                      |                                                |                                               |
| Suppurative local complication (%)      | 0 (0)               | 2 (15) <sup>§</sup>        | 0 (0)                       |                                                |                                               |
| Distal complication (%)                 | 0 (0)               | 0 (0)                      | 0 (0)                       |                                                |                                               |
| Targeted therapy restart (%)            | 6 (86)              | 8 (62)                     | 5 (56)                      |                                                |                                               |
| All-cause mortality* (%)                | 1 (14)              | 3 (23)                     | 2 (22)                      |                                                |                                               |
| <b>Clinical response through day 90</b> |                     |                            |                             |                                                |                                               |
| <b>Clinical success (%)</b>             | <b>107 (93.0)</b>   | <b>114 (89.8)</b>          | <b>124 (90.5)</b>           | <b>-2.5<br/>(-infinity, 4.2);<br/>&lt;.001</b> | <b>0.7<br/>(-infinity, 7.9);<br/>.006</b>     |
| <b>Clinical failure (%)</b>             | <b>8 (7.0)</b>      | <b>13 (10.2)</b>           | <b>13 (9.5)</b>             |                                                |                                               |
| Recurrent bacteremia (%)                | 0 (0)               | 1 (77) <sup>§</sup>        | 2 (15)                      |                                                |                                               |
| Suppurative local complication (%)      | 0 (0)               | 2 (15) <sup>§</sup>        | 0 (0)                       |                                                |                                               |
| Distal complication (%)                 | 0 (0)               | 0 (0)                      | 0 (0)                       |                                                |                                               |
| Targeted therapy restart (%)            | 7 (88)              | 8 (62)                     | 9 (70)                      |                                                |                                               |
| All-cause mortality* (%)                | 1 (12)              | 3 (23)                     | 2 (15)                      |                                                |                                               |

\*Through day 30. <sup>§</sup>One patient had both recurrent bacteremia and a suppurative local complication by day 30.

°P value for non-inferiority (see Supplement).



**Table S3. Protocol deviations by study group and reasons for non-adherence to treatment duration assignment, primary analysis set.**

|                                                                              | CRP-guided<br>n=169 | 7 days<br>n=169 | 14 days<br>n=165 |
|------------------------------------------------------------------------------|---------------------|-----------------|------------------|
| <b>Number excluded from per-protocol population (%)</b>                      | <b>39 (23)</b>      | <b>28 (17)</b>  | <b>22 (13)</b>   |
| Lost to follow-up by day 30 (%)                                              | 5 (13)              | 3 (11)          | 2 (9)            |
| <b>Protocol deviation (%):</b>                                               | <b>34 (87)</b>      | <b>25 (89)</b>  | <b>20 (91)</b>   |
| <b>Antibiotic duration exceeded protocol-designated duration (%)</b>         | <b>13 (38)</b>      | <b>24 (96)</b>  | <b>7 (35)</b>    |
| - Reason:                                                                    |                     |                 |                  |
| - Unintentional (logistic difficulty or communication error) (%)             | 9 (69)              | 13 (54)         | 4 (57)           |
| - Physician overrode duration assignment, complication suspected (%)         | 1 (8)               | 1 (4)           | 1 (14)           |
| - Physician overrode duration assignment in absence of complication (%)      | 3 (23)              | 10 (42)         | 1 (14)           |
| - Patient's wish, outpatient physician agreed (%)                            | 0 (0)               | 0 (0)           | 1 (14)           |
| - Modality:                                                                  |                     |                 |                  |
| - CRP decreased by 75% but therapy continued (%)                             | 10 (77)             | NA              | NA               |
| - CRP did not decrease by 75% and therapy continued >14 days (%)             | 3 (23)              | NA              | NA               |
| <b>Antibiotic duration was shorter than protocol-designated duration (%)</b> | <b>9 (26)</b>       | <b>1 (4)</b>    | <b>13 (65)</b>   |
| - Reason:                                                                    |                     |                 |                  |
| - Unintentional (logistic or communicative error) (%)                        | 0 (0)               | 0 (0)           | 9 (69)           |
| - Physician overrode duration assignment, evidence of side effect (%)        | 7 (78)              | 0 (0)           | 1 (8)            |
| - Physician overrode duration assignment in absence of side effect (%)       | 1 (11)              | 0 (0)           | 1 (8)            |
| - Patient's wish (%)                                                         | 1 (11)              | 1 (100)         | 2 (15)           |
| - Modality:                                                                  |                     |                 |                  |
| - Duration was <5 days (%)                                                   | 0 (0)               | 1 (100)         | 0 (0)            |
| - Therapy discontinued although CRP had not decreased by 75% (%)             | 8 (89)              | NA              | NA               |
| - Antibiotic discontinued despite fever in the preceding 48h (%)             | 1 (11)              | NA              | NA               |
| <b>Insufficient CRP data* (%)</b>                                            | <b>12 (35)</b>      | NA              | NA               |
| - Physician prescribed 7 ( $\pm$ 1) days (%)                                 | 8 (67)              |                 |                  |
| - Physician prescribed 10 ( $\pm$ 1) days (%)                                | 2 (17)              | NA              | NA               |
| - Physician prescribed 14 ( $\pm$ ) days (%)                                 | 2 (17)              |                 |                  |

\*No discernible peak value was obtained, or no follow-up value documenting a 75% reduction from peak was obtained.

**Table S4. Baseline characteristics and outcomes of patients receiving antibiotic therapy durations longer than the per-protocol assignment.**

|                                                                                            | CRP-guided group      |                                     | 7-day group           |                              | 14-day group          |                             |
|--------------------------------------------------------------------------------------------|-----------------------|-------------------------------------|-----------------------|------------------------------|-----------------------|-----------------------------|
|                                                                                            | Per-protocol<br>n=130 | Received<br>≥3 days<br>more<br>n=13 | Per-protocol<br>n=141 | Received<br>≥10 days<br>n=24 | Per-protocol<br>n=143 | Received<br>≥17 days<br>n=7 |
| <b>Baseline characteristics</b>                                                            |                       |                                     |                       |                              |                       |                             |
| Female sex (%)                                                                             | 77 (59)               | 12 (92)                             | 90 (64)               | 13 (54)                      | 80 (56)               | 4 (57)                      |
| Male sex (%)                                                                               | 53 (41)               | 1 (8)                               | 51 (36)               | 11 (46)                      | 63 (44)               | 3 (43)                      |
| Median age (IQR)                                                                           | 79 (71-86)            | 76 (61-83)                          | 80 (70-87)            | 74 (67-82)                   | 79 (64-85)            | 83 (70-90)                  |
| Median body mass index (IQR)                                                               | 26 (23-31)            | 28 (21-30)                          | 26 (23-30)            | 25 (24-30)                   | 26 (24-29)            | 20 (18-21)                  |
| Median estimated glomerular filtration rate at inclusion, ml/min/1.73 m <sup>2</sup> (IQR) | 51 (37-72)            | 44 (18-59)                          | 51 (32-70)            | 58 (43-79)                   | 56 (38-74)            | 52 (33-98)                  |
| Median Charlson comorbidity index (IQR)                                                    | 1 (0-2)               | 1 (0-3)                             | 1 (0-2)               | 1 (0-3)                      | 1 (0-2)               | 2 (1-6)                     |
| Diabetes mellitus (%)                                                                      | 30 (23)               | 5 (38)                              | 31 (22)               | 1 (4)                        | 33 (23)               | 0 (0)                       |
| Presence of removable urethral catheter (%)                                                | 14 (11)               | 1 (8)                               | 6 (4)                 | 1 (4)                        | 19 (13)               | 1 (14)                      |
| Presence of implanted foreign-body material (%)                                            | 32 (25)               | 2 (15)                              | 30 (21)               | 5 (20)                       | 26 (18)               | 2 (29)                      |
| -Artificial joint (%)                                                                      | 4 (3)                 | 0 (0)                               | 3 (2)                 | 0 (0)                        | 5 (4)                 | 1 (14)                      |
| -Implanted urinary-tract device (%)                                                        | 4 (3)                 | 0 (0)                               | 5 (4)                 | 0 (0)                        | 9 (6)                 | 0 (0)                       |
| -Endovascular device (%)                                                                   | 3 (2)                 | 0 (0)                               | 2 (1)                 | 0 (0)                        | 0 (0)                 | 0 (0)                       |
| -Artificial valve (%)                                                                      | 3 (2)                 | 1 (8)                               | 2 (1)                 | 0 (0)                        | 0 (0)                 | 0 (0)                       |
| -Other (%)                                                                                 | 18 (14)               | 1 (8)                               | 19 (13)               | 5 (20)                       | 13 (9)                | 1 (14)                      |
| Source of bacteremia                                                                       |                       |                                     |                       |                              |                       |                             |
| -Urinary (%)                                                                               | 98 (75)               | 8 (62)                              | 91 (65)               | 13 (54)                      | 102 (71)              | 3 (43)                      |
| -Abdominal (%)                                                                             | 22 (17)               | 3 (23)                              | 29 (21)               | 8 (33)                       | 17 (12)               | 2 (29)                      |
| -Pulmonary (%)                                                                             | 5 (4)                 | 0 (0)                               | 13 (9)                | 1 (4)                        | 13 (9)                | 2 (29)                      |
| -Endovascular device (%)                                                                   | 1 (1)                 | 0 (0)                               | 4 (3)                 | 0 (0)                        | 5 (3)                 | 0 (0)                       |
| -Wound (%)                                                                                 | 0 (0)                 | 0 (0)                               | 2 (1)                 | 1 (4)                        | 2 (1)                 | 0 (0)                       |
| -Unknown (%)                                                                               | 5 (4)                 | 2 (15)                              | 2 (1)                 | 2 (8)                        | 4 (3)                 | 0 (0)                       |
| Bacteremia acquisition                                                                     |                       |                                     |                       |                              |                       |                             |
| -Community-acquired* (%)                                                                   | 85 (65)               | 10 (77)                             | 90 (64)               | 14 (58)                      | 84 (59)               | 4 (57)                      |
| -Nosocomial (%)                                                                            | 33 (25)               | 1 (8)                               | 37 (26)               | 8 (33)                       | 39 (27)               | 3 (42)                      |
| -Healthcare-associated (%)                                                                 | 12 (9)                | 2 (15)                              | 14 (10)               | 2 (8)                        | 20 (14)               | 0 (0)                       |
| Median qSOFA score (IQR)                                                                   | 1 (0-2)               | 1 (1-2)                             | 1 (0-2)               | 1 (0-1)                      | 1 (0-1)               | 1 (0-3)                     |
| <b>Clinical outcomes</b>                                                                   |                       |                                     |                       |                              |                       |                             |
| Day 30 clinical success (%)                                                                | 127 (97.7)            | 13 (100)                            | 133 (94.3)            | 21 (87.5)                    | 137 (95.8)            | 6 (85.7)                    |
| Day 30 clinical failure (%)                                                                | 3 (2.3)               | 0 (0)                               | 8 (5.7)               | 3 (12.5)                     | 6 (4.2)               | 1 (14.3)                    |
| Day 60 clinical success (%)                                                                | 116 (94.3)            | 13 (100)                            | 119 (90.2)            | 21 (87.5)                    | 131 (93.6)            | 4 (80.0)*                   |
| Day 60 clinical failure (%)                                                                | 7 (5.7)               | 0 (0)                               | 13 (9.8)              | 3 (12.5)                     | 9 (6.4)               | 1 (20.0)*                   |
| Day 90 clinical success (%)                                                                | 107 (93.0)            | 13 (100)                            | 114 (89.8)            | 21 (87.5)                    | 124 (90.5)            | 3 (75.0)*                   |
| Day 90 clinical failure (%)                                                                | 8 (7.0)               | 0 (0)                               | 13 (10.2)             | 3 (12.5)                     | 13 (9.5)              | 1 (25.0)*                   |

\*In this group of seven patients, two were lost to follow-up by day 60, and a third patient by day 90.

**Table S5A. Patients and clinical failure in the CRP-guided group by days of antibiotic therapy received.**

| Antibiotic duration, days | Patients, n                   |                           | Clinical failure through day 30, n |              |
|---------------------------|-------------------------------|---------------------------|------------------------------------|--------------|
|                           | Primary analysis<br>N=169 (%) | Per-protocol<br>N=130 (%) | Primary analysis                   | Per-protocol |
| 5                         | 14 (8)                        | 13 (10)                   | 0                                  | 0            |
| 6                         | 29 (17)                       | 26 (20)                   | 2                                  | 2            |
| 7                         | 42 (25)                       | 35 (27)                   | 1                                  | 1            |
| 8                         | 23 (14)                       | 17 (13)                   | 0                                  | 0            |
| 9                         | 9 (5)                         | 5 (4)                     | 0                                  | 0            |
| 10                        | 22 (13)                       | 20 (15)                   | 0                                  | 0            |
| 11                        | 4 (2)                         | 3 (2)                     | 1                                  | 0            |
| 12                        | 2 (1)                         | 1 (1)                     | 0                                  | 0            |
| 13                        | 6 (4)                         | 4 (3)                     | 0                                  | 0            |
| 14                        | 10 (6)                        | 4 (3)                     | 0                                  | 0            |
| 15                        | 4 (2)                         | 2 (2)                     | 0                                  | 0            |
| 16                        | 2 (1)                         | 0 (0)                     | 0                                  | 0            |
| 17                        | 1 (1)                         | 0 (0)                     | 0                                  | 0            |
| 18-27                     | 0 (0)                         | 0 (0)                     | 0                                  | 0            |
| 28*                       | 1 (1)                         | 0 (0)                     | 0                                  | 0            |

\* The patient in the CRP group receiving 28 days of antibiotics was diagnosed with multiple renal abscesses the day after randomization.

**Table S5B. C-reactive protein kinetics by study group.**

|                                           | CRP-guided<br>N=169 | 7 days<br>N=169 | 14 days<br>N=165 |
|-------------------------------------------|---------------------|-----------------|------------------|
| Median peak CRP concentration, mg/l (IQR) | 171 (112-251)       | 164 (104-246)   | 154 (104-250)    |
| Peak CRP, median study day* (IQR)         | 1 (0-2)             | 1 (0-2)         | 1 (0-2)          |
| 75% reduction from peak within 3 days (%) | 36 (21)             | 38 (23)         | 54 (32)          |
| 50% reduction from peak within 3 days (%) | 91 (53)             | 94 (56)         | 94 (57)          |

\*Day 1 was the day that microbiologically efficacious antibiotic therapy was begun, thus day 0 was the day before.

**Table S6. All-cause mortality by treatment group at all study time points (primary analysis population).**

|                                                    | CRP-guided<br>n=169  | 7 days<br>n=169      | 14 days<br>n=165   | P value*<br>CRP-<br>guided vs<br>14 days | P value*<br>7 days vs<br>14 days |
|----------------------------------------------------|----------------------|----------------------|--------------------|------------------------------------------|----------------------------------|
| Mortality through day 30 (%)<br><i>Missing (%)</i> | 2 (1.2)<br>5 (3.0)   | 6 (3.7)<br>3 (1.8)   | 4 (2.4)<br>2 (1.2) | .45                                      | .75                              |
| Mortality through day 60 (%)<br><i>Missing (%)</i> | 7 (4.4)<br>9 (5.3)   | 11 (6.9)<br>7 (4.1)  | 8 (4.9)<br>3 (1.8) | 1.0                                      | .64                              |
| Mortality through day 90 (%)<br><i>Missing (%)</i> | 13 (8.4)<br>15 (8.9) | 14 (8.9)<br>10 (5.9) | 9 (5.6)<br>7 (4.2) | .38                                      | .39                              |

\*Two-sided alpha, Fisher exact test

**Table S7. Sensitivity analyses for the primary outcome with best-worst-case and worst-best-case scenarios.**

Table S7A shows the “best-worst” case, in which it is assumed that all participants lost to follow-up in the CRP-guided and 7-day groups have had clinical success, and that all those with missing outcomes in the 14-day arm have experienced clinical failure. Table S7B shows the “worst-best” case, in which it is assumed that all participants lost to follow-up in the CRP-guided and 7-day groups have experienced clinical failure, and that all those with missing outcomes in the 14-day group have experienced clinical success.

| <b>Table S7A: Best-worst case sensitivity analysis for clinical response through day 30</b> |                     |                            |                             |                                 |                                 |
|---------------------------------------------------------------------------------------------|---------------------|----------------------------|-----------------------------|---------------------------------|---------------------------------|
|                                                                                             | CRP-guided<br>N=169 | 7 days<br>(fixed)<br>N=169 | 14 days<br>(fixed)<br>N=165 | % Difference                    |                                 |
|                                                                                             |                     |                            |                             | CRP-guided vs 14 days           | 7 days vs 14 days               |
|                                                                                             |                     |                            |                             | 1-sided 97.5%CI; P              | 1-sided 97.5%CI; P              |
| Clinical success (%)                                                                        | 165 (97.6)          | 158 (93.5)                 | 154 (93.3)                  | -4.3 (-infinity, 0.1);<br><.001 | -0.2 (-infinity, 5.2);<br><.001 |
| Clinical failure (%)                                                                        | 4 (2.4)             | 11 (6.5)                   | 11 (6.7)                    |                                 |                                 |
| <b>Table S7B: Worst-best case sensitivity analysis for clinical response through day 30</b> |                     |                            |                             |                                 |                                 |
|                                                                                             | CRP-guided<br>N=169 | 7 days<br>(fixed)<br>N=169 | 14 days<br>(fixed)<br>N=165 | % Difference                    |                                 |
|                                                                                             |                     |                            |                             | CRP-guided vs 14 days           | 7 days vs 14 days               |
|                                                                                             |                     |                            |                             | 1-sided 97.5%CI; P              | 1-sided 97.5%CI; P              |
| Clinical success (%)                                                                        | 160 (95.0)          | 155 (91.7)                 | 156 (94.5)                  | -0.5 (-infinity, 4.7);<br><.001 | 2.8 (-infinity, 8.2);<br>.005   |
| Clinical failure (%)                                                                        | 9 (5.3)             | 14 (8.3)                   | 9 (5.5)                     |                                 |                                 |

\*P value for non-inferiority (see Supplement).

**Table S8. Mixed-effects modeling results.**

Odds ratios are for failure by day 30 according to treatment duration, with study site as a random intercept (site effect estimate 0.18 [97.5% CI 0.002-15.80]).

|                                | Odds ratio | 97.5%CI   |
|--------------------------------|------------|-----------|
| CRP-guided versus 14-day group | 0.43       | 0.19-1.68 |
| 7-day versus 14-day group      | 1.22       | 0.43-3.44 |

**Table S9. Bivariable logistic regression models for clinical failure at day 30.**

|                                   | Odds ratio | 95% CI       | P value |
|-----------------------------------|------------|--------------|---------|
| Age                               |            |              |         |
| - <70 years                       | 0.11       | 0.01 - 0.81  | .03     |
| - 70-79 years                     | 1.98       | 0.84 - 4.65  | .12     |
| - 80-89 years                     | 1.34       | 0.58 - 3.09  | .49     |
| - >90 years                       | 1.29       | 0.43 - 3.89  | .65     |
| Male sex                          | 0.92       | 0.40 - 2.15  | .85     |
| Site of infection                 |            |              |         |
| - Urinary site                    | 0.50       | 0.22 - 1.14  | .10     |
| - Abdominal                       | 0.67       | 0.20 - 2.31  | .53     |
| - Pulmonary                       | 4.87       | 1.80 - 13.17 | .002    |
| Type of acquisition               |            |              |         |
| - Community-acquired              | 1.03       | 0.44 - 2.40  | .95     |
| - Nosocomial                      | 1.35       | 0.56 - 3.22  | .50     |
| - Health-care associated          | 0.35       | 0.05 - 2.64  | .31     |
| Presence of foreign-body material | 3.28       | 1.42 - 7.55  | .005    |
| qSOFA score                       |            |              |         |
| - 0                               | 1.13       | 0.50 - 2.58  | .77     |
| - 1                               | 0.59       | 0.22 - 1.61  | .31     |
| - 2                               | 1.11       | 0.40 - 3.04  | .85     |
| - 3                               | 1.82       | 0.52 - 6.42  | .35     |
| Charlson comorbidity index        |            |              |         |
| - <1                              | 0.65       | 0.26 - 1.60  | .35     |
| - 1-2                             | 1.03       | 0.45 - 2.37  | .94     |
| - >2                              | 1.62       | 0.65 - 4.02  | .30     |
| Study site                        |            |              |         |
| - Geneva                          | 0.44       | 0.18 - 1.08  | .07     |
| - Lausanne                        | 1.52       | 0.65 - 3.55  | .34     |
| - St. Gallen                      | 1.65       | 0.69 - 3.96  | .26     |
| Pathogen                          |            |              |         |
| - <i>Escherichia coli</i>         | 0.28       | 0.12 - 0.63  | .002    |
| - <i>Klebsiella</i> spp.          | 2.55       | 1.05 - 6.16  | .04     |
| - <i>Proteus</i> spp.             | 3.80       | 1.03 - 13.98 | .05     |
| Delay in appropriate therapy*     |            |              |         |
| - 1 day                           | 1.74       | 0.49 - 6.15  | .39     |
| - 2 days                          | 1.00       | NA           | NA      |
| - ≥3 days                         | 1.16       | 0.15 - 9.15  | .89     |
| Empiric cephalosporin therapy     | 1.41       | 0.52 - 3.86  | .50     |
| Empiric carbapenem therapy        | 0.96       | 0.28 - 3.30  | .94     |
| Empiric penicillin-based therapy  |            |              |         |
| - Amoxicillin-clavulanate         | 1.64       | 0.59 - 4.53  | NA      |
| - Piperacillin-tazobactam         | 3.54       | 1.49 - 8.41  | .004    |
| Fluoroquinolone therapy           | 0.48       | 0.18 - 1.32  | .16     |
| Co-trimoxazole therapy            | 0.70       | 0.23 - 2.10  | .53     |
| Intravenous-to-oral switch        | 0.594      | 0.26 - 1.36  | .22     |

\*Beginning at presentation, due to resistance.

**Table S10A. Multivariable logistic regression model for clinical failure at day 30.**

This model includes variables as pre-specified in the statistical analysis plan.

|                                              | Odds ratio | 95% CI       | P value |
|----------------------------------------------|------------|--------------|---------|
| Age                                          |            |              |         |
| - <70 years                                  | 0.10       | 0.01 – 0.79  | .03     |
| Female sex                                   | 0.60       | 0.23 - 1.54  | .29     |
| Charlson index >2                            | 1.24       | 0.46 - 3.35  | .67     |
| qSOFA score=3                                | 1.26       | 0.32 – 5.00  | .74     |
| Site of infection                            |            |              |         |
| - Pulmonary                                  | 3.88       | 1.27 - 11.83 | .02     |
| Presence of foreign-body material            | 2.82       | 1.15 - 6.92  | .02     |
| Pathogen                                     |            |              |         |
| - <i>Klebsiella</i> spp.                     | 2.22       | 0.85 - 5.83  | .11     |
| Empiric therapy with piperacillin-tazobactam | 2.44       | 0.94 – 6.32  | .07     |

Hosmer-Lemeshow  $\chi^2 = 2.33$ ,  $P=.94$ .

**Table S10B. *Post-hoc* multivariable logistic regression model for clinical failure at day 30.**

This model was constructed *post-hoc* with fewer variables introduced, in order to avoid over-fitting given the relatively small number of failure events.

|                                              | Odds ratio | 95% CI       | P value |
|----------------------------------------------|------------|--------------|---------|
| Age                                          |            |              |         |
| - <70 years                                  | 0.10       | 0.01- 0.79   | .03     |
| Site of infection                            |            |              |         |
| - Pulmonary                                  | 3.78       | 1.26 - 11.32 | .02     |
| Presence of foreign-body material            | 2.61       | 1.09 - 6.24  | .03     |
| Pathogen                                     |            |              |         |
| - <i>Klebsiella</i> spp.                     | 2.20       | 0.85 - 5.67  | .10     |
| Empiric therapy with piperacillin-tazobactam | 2.41       | 0.95 – 6.10  | .06     |

Hosmer-Lemeshow  $\chi^2 = 2.47$ ,  $P=.78$

**Table S11. Adverse events considered possibly, probably or certainly related to study antibiotic(s).**

| <b>Adverse event</b>              | <b>CRP-guided group<br/>n=169</b> | <b>7-day group<br/>n=169</b> | <b>14-day group<br/>n=165</b> |
|-----------------------------------|-----------------------------------|------------------------------|-------------------------------|
| <i>Missing by day 30, n</i>       | 5                                 | 3                            | 2                             |
| <i>C. difficile</i> infection (%) | 7 (4.3)                           | 2 (1.2)                      | 4 (2.4)                       |
| Diarrhea (%)                      | 2 (1.2)                           | 2 (1.2)                      | 1 (0.6)                       |
| Rash (%)                          | 0 (0)                             | 1 (0.6)                      | 1 (0.6)                       |
| Pruritis (%)                      | 1 (0.6)                           | 0 (0)                        | 0 (0)                         |
| Glossitis (%)                     | 0 (0)                             | 0 (0)                        | 1 (0.6)                       |
| Thrush (%)                        | 0 (0)                             | 1 (0.6)                      | 1 (0.6)                       |
| Tongue discoloration (%)          | 0 (0)                             | 1 (0.6)                      | 0 (0)                         |
| Abdominal pain/cramping (%)       | 1 (0.6)                           | 0 (0)                        | 0 (0)                         |
| Catheter infection (%)            | 0 (0)                             | 1 (0.6)                      | 0 (0)                         |
| Elevated creatinine (%)           | 0 (0)                             | 0 (0)                        | 1 (0.6)                       |
| Headache (%)                      | 0 (0)                             | 0 (0)                        | 1 (0.6)                       |
| Fever (%)                         | 1 (0.6)                           | 0 (0)                        | 0 (0)                         |
| QT prolongation (%)               | 0 (0)                             | 0 (0)                        | 1 (0.6)                       |
| <b>Total (%)</b>                  | <b>12 (7.3)</b>                   | <b>8 (4.8)</b>               | <b>11 (6.7)</b>               |

**Table S12. Serious adverse events considered possibly, probably or certainly related to study antibiotic(s).**

| <b>Serious adverse event</b>                          | <b>CRP-guided group<br/>n=169</b> | <b>7-day group<br/>n=169</b> | <b>14-day group<br/>n=165</b> |
|-------------------------------------------------------|-----------------------------------|------------------------------|-------------------------------|
| <i>Missing by day 90, n</i>                           | 15                                | 10                           | 7                             |
| Hospitalization for <i>C. difficile</i> infection (%) | 1 (0.6)                           | 1 (0.6)                      | 1 (0.6)                       |
| Hospitalization for abdominal pain (%)                | 0 (0)                             | 1 (0.6)                      | 0 (0)                         |
| Hospitalization for headache (%)                      | 0 (0)                             | 0 (0)                        | 1 (0.6)                       |
| Death* (%)                                            | 0 (0)                             | 1 (0.6)                      | 0 (0)                         |
| <b>Total (%)</b>                                      | <b>1 (0.6)</b>                    | <b>3 (1.8)</b>               | <b>2 (1.2)</b>                |

\*Cause unknown, occurred shortly after discontinuing antibiotic therapy. All cultures negative.

## References

1. Oliveira CF, Botoni FA, Oliveira CR, et al. Procalcitonin versus C-reactive protein for guiding antibiotic therapy in sepsis: a randomized trial. *Crit Care Med*. 2013;41(10):2336-2343.
2. Nobre V, Harbarth S, Graf JD, Rohner P, Pugin J. Use of procalcitonin to shorten antibiotic treatment duration in septic patients: a randomized trial. *Am J Respir Crit Care Med*. 2008;177(5):498-505.
3. Bouadma L, Luyt CE, Tubach F, et al. Use of procalcitonin to reduce patients' exposure to antibiotics in intensive care units (PRORATA trial): a multicentre randomised controlled trial. *Lancet*. 2010;375(9713):463-474.
4. de Jong E, van Oers JA, Beishuizen A, et al. Efficacy and safety of procalcitonin guidance in reducing the duration of antibiotic treatment in critically ill patients: a randomised, controlled, open-label trial. *Lancet Infect Dis*. 2016;16(7):819-827.
5. Albrich WC, Harbarth S. Pros and cons of using biomarkers versus clinical decisions in start and stop decisions for antibiotics in the critical care setting. *Intensive Care Med*. 2015;41(10):1739-1751.
6. Schuetz P, Briel M, Christ-Crain M, et al. Procalcitonin to guide initiation and duration of antibiotic treatment in acute respiratory infections: an individual patient data meta-analysis. *Clin Infect Dis*. 2012;55(5):651-662.
7. Reinhart K, Bauer M, Riedemann NC, Hartog CS. New approaches to sepsis: molecular diagnostics and biomarkers. *Clin Microbiol Rev*. 2012;25(4):609-634.
