# Supplementary material
Source: PubMed Central journal article supplement (PMC7267846)
Supplement: jama-323-2160-s004.pdf [file jama-323-2160-s004.pdf]

## Data Sharing Statement

### Data

**Data available:** Yes

**Data types:** Deidentified participant data

**How to access data:** Data will be made upon reasonable request to [angela.huttner@hcuge.ch](mailto:angela.huttner@hcuge.ch)

**When available:** With publication

### Supporting Documents

**Document types:** None

### Additional Information

**Who can access the data:** Individual participant data that underlie the results reported in this article may be shared after de-identification with investigators whose proposed use of the data has been approved by an independent review committee identified for this purpose.

**Types of analyses:** The data may be used only for the aims stated in the submitted protocol.

**Mechanisms of data availability:** With investigator support after approval of a proposal, with signed data access agreement.
